# Supplementary material for: Development and application of a 1K functional liquid chip for lactation performance in Bactrian camels
Source: Front Vet Sci. 2024 Jul 2;11:1359923. doi: 10.3389/fvets.2024.1359923 (PMC11253134; doi:10.3389/fvets.2024.1359923)
Supplement: Supplementary file 1 [file Table_1.XLSX]

## Sheet: Sheet2
Table S1. Summary of the mapping information for each sample.
SampleID	Raw Reads	Clean Reads	Clean Base(G)	Error Rate(%)	Q20(%)	Q30(%)	GC Content(%)	Mapping Rate(%)
12	46690510	46039792	6.91	0.03	97.79	93.49	50.16	0.9311
13	48155014	47373766	7.11	0.03	97.96	93.87	51.63	0.9534
15	48181148	47328116	7.1	0.03	97.88	93.75	52.64	0.918
17	48880734	48046904	7.21	0.03	98.04	94.13	54.37	0.9289
19	49486278	48635816	7.3	0.03	98	94.02	54.66	0.9447
21	47584568	46608968	6.99	0.02	98.32	94.99	55.19	0.945
22	48305434	47333912	7.1	0.02	98.46	95.34	56.45	0.9404
49	50032108	48882130	7.33	0.02	98.4	95.29	53.2	0.9261
51	46755150	45209642	6.78	0.02	98.19	95.17	53.75	0.9376
54	40183842	39250308	5.89	0.02	98.8	96.2	54.81	0.946
55	42677696	41335914	6.2	0.02	98.74	96.07	55.3	0.9586
60	43070624	41637412	6.25	0.02	98.5	95.65	54.79	0.939
62	44562972	43108094	6.47	0.02	98.17	94.86	51.89	0.9009
66	49001154	47681704	7.15	0.02	98.35	95.25	53.21	0.9155
68	50354270	49015186	7.35	0.02	98.3	95.17	55.9	0.8804
69	49978096	48615160	7.29	0.02	98.05	94.45	51.96	0.9054
72	40571022	39437250	5.92	0.02	98.3	95.19	54.5	0.9004
73	51080440	49835060	7.48	0.02	98.53	95.62	53.99	0.9248
74	52547392	51150504	7.67	0.02	98.48	95.49	53.37	0.9334
75	52005268	50746242	7.61	0.02	98.47	95.47	55.33	0.914
288	115508266	111785372	33.54	0.03	97.67	93.55	53.39	0.9165
289	52955978	51273507	15.38	0.03	97.93	94	52.45	0.9136
290	49554808	48150423	14.45	0.03	97.41	92.94	52.3	0.915
292	51202715	50013549	15	0.03	97.67	93.47	51.84	0.9116
293	49311111	47933843	14.38	0.03	97.44	93.12	52.46	0.9139
294	58318721	56165653	16.85	0.03	97.83	93.84	54.55	0.9469
296	55975001	54893658	16.47	0.03	97.75	93.58	51.87	0.909
297	43295105	42128915	12.64	0.03	98.34	94.91	52.97	0.8973
298	45524125	43677798	13.1	0.03	97.26	92.78	51.74	0.9106
299	45634545	45209814	13.56	0.03	97.33	92.72	53.06	0.8977
300	52024275	51586157	15.48	0.03	98.07	94.27	54.01	0.9022
301	48119751	47095303	14.13	0.03	97.78	93.69	53.19	0.9154
302	44195980	43231332	12.97	0.03	98.28	94.8	53.18	0.9046
303	45175873	44108929	13.23	0.03	98.31	94.86	53.41	0.9087
304	45473045	44395504	13.32	0.03	98.19	94.59	52.25	0.8993
305	48780303	47801486	14.34	0.03	98.09	94.17	52.23	0.909
306	64048257	63049042	18.91	0.03	98.2	94.61	54.2	0.8879
307	52100097	50719341	15.22	0.03	97.8	93.78	53.92	0.9158
405	16674843	16470412	4.94	0.02	98.06	94.62	51.75	0.918
406	21847054	21559481	6.47	0.02	98.05	94.59	51.52	0.9173
407	19782406	19505408	5.85	0.03	97.83	94.09	51.5	0.9179
409	23195509	22887071	6.87	0.03	97.91	94.23	51.42	0.9165
410	23457272	23180755	6.95	0.03	98	94.5	51.34	0.9181
411	21221151	20985187	6.3	0.03	98	94.48	51.78	0.9185
418	17449005	17233021	5.17	0.03	97.92	94.27	51.75	0.927
419	21212568	20931333	6.28	0.03	97.81	94.02	51.85	0.9268
420	21860965	21574337	6.47	0.03	97.82	94.08	52.08	0.9281
421	21720629	21428728	6.43	0.03	98.06	94.6	51.84	0.9149
422	21362711	21042855	6.31	0.03	97.94	94.39	52.14	0.9273
423	26189350	25889570	7.77	0.03	97.55	93.16	52.07	0.9149
424	20360706	20127495	6.04	0.03	97.97	94.4	51.81	0.9173
425	19755555	19542272	5.86	0.03	97.91	94.31	51.24	0.9228
427	22304507	21987263	6.6	0.03	97.78	94	51.7	0.9183
428	17310185	17094779	5.13	0.03	97.98	94.43	51.85	0.9172
435	22879104	22523272	6.76	0.03	97.88	94.22	51.52	0.9054
436	19875708	19626969	5.89	0.02	98.07	94.62	51.47	0.918
445	26627345	26204680	7.86	0.03	97.73	93.53	52.6	0.9157
446	22487496	22090168	6.63	0.03	97.97	94.44	51.11	0.9237
447	20367703	20125008	6.04	0.03	98.03	94.51	51.54	0.9283
448	20396329	20078161	6.02	0.03	97.88	94.4	51.57	0.9229
449	20389665	20078351	6.02	0.02	98.14	94.81	51.73	0.921
863	72889492	71607262	10.74	0.03	96.93	91.19	52.39	0.9088
866	49062214	48151526	7.22	0.03	97.1	91.82	51.76	0.9137
867	72647698	71266818	10.69	0.03	97.58	93.01	51.18	0.9176
869	71767658	70317132	10.55	0.03	97.07	91.68	51	0.9113
873	63894666	60736234	9.11	0.03	97.51	92.84	48.67	0.9402
875	62266210	59480572	8.92	0.03	97.15	91.96	42.37	0.9502
876	56768648	55238070	8.29	0.03	97.19	92	51.76	0.9218
877	67448170	65630590	9.84	0.03	97.49	92.78	51.52	0.9187
879	68219526	66158020	9.92	0.03	97.16	91.84	51.25	0.9191
880	77018618	74977184	11.25	0.03	96.71	90.56	51.53	0.9148
884	82789916	80975650	12.15	0.03	96.84	91	53.26	0.918
885	50498644	49493566	7.42	0.04	95.06	87.05	52.7	0.8934
887	68035756	66841732	10.03	0.03	96.86	91.19	51.76	0.9061
888	58319778	57081188	8.56	0.03	97.32	92.31	52.09	0.9209
889	59285794	58001060	8.7	0.03	97.22	91.97	51.35	0.9195
890	70906286	69488182	10.42	0.03	97.13	91.79	51.57	0.9173
892	71152396	69801546	10.47	0.03	96.97	91.4	51.34	0.908
893	143386964	139835242	20.98	0.03	97.62	92.95	51.85	0.9226
894	47435922	46333242	6.95	0.03	97.15	91.84	50.89	0.9187
896	58930684	57589048	8.64	0.03	97.03	91.58	51.42	0.9131
903	62073082	59938232	8.99	0.03	97.11	91.87	51.13	0.9218
904	70495460	69094902	10.36	0.03	97.17	91.92	52.9	0.9251
906	72055380	70566952	10.59	0.03	97.11	91.74	51.98	0.9224
908	68852096	67513046	10.13	0.04	94.89	86.89	51.64	0.8939
910	91266570	89578810	13.44	0.03	97.37	92.1	50.54	0.9248
911	73286822	71866386	10.78	0.03	96.99	91.38	50.99	0.916
912	78111320	76582196	11.49	0.03	96.32	89.74	51.38	0.9107
913	76873884	75330184	11.3	0.03	96.91	91.18	50.98	0.919
914	47781614	46711664	7.01	0.03	97.13	91.79	50.1	0.9268
915	67667042	66356492	9.95	0.03	96.8	90.87	51.11	0.9136
918	64880856	63467944	9.52	0.03	96.83	91.01	51.57	0.9111
932	71571202	70096220	10.51	0.03	97.01	91.53	50.89	0.9178
934	74941924	72865354	10.93	0.03	97.58	92.75	50.96	0.9261
936	73401910	72023246	10.8	0.03	97.09	91.7	53.1	0.9102
937	75008684	73638722	11.05	0.03	97.2	91.92	51.54	0.9109
940	76872402	75399640	11.31	0.03	97.46	92.38	50.81	0.9153
941	44846614	44039878	6.61	0.03	96.95	91.25	50.88	0.9074
942	52461062	51569158	7.74	0.03	96.5	90.12	50.86	0.9018
944	65200438	63598550	9.54	0.03	97.33	92.35	50.62	0.9154
945	49885236	48688134	7.3	0.02	97.79	93.52	49.44	0.9274
947	121067684	118245068	17.74	0.03	97.23	91.91	51.32	0.919
949	63512402	62049290	9.31	0.03	97.18	91.86	50.96	0.9147
952	76826176	74834098	11.23	0.03	97.41	92.28	51.64	0.9272
953	73994556	72787194	10.92	0.03	97.24	92.16	52.7	0.9079
954	124061946	121228876	18.18	0.02	98.06	94.27	51.7	0.9263
955	51990864	51096402	7.66	0.03	97.28	92.17	51.65	0.9135
956	58421234	57357714	8.6	0.03	97.55	92.92	51.29	0.9174
959	49621496	48666754	7.3	0.03	97	91.39	50.95	0.9276
962	67209476	65757150	9.86	0.03	97.48	92.75	52.74	0.9271
966	43105200	41792796	6.27	0.03	97.57	92.94	52.33	0.9311
967	40548586	39182268	5.88	0.02	97.85	93.8	51.61	0.9389
968	64872750	62804592	9.42	0.03	96.79	91.07	52.71	0.9256
969	83426748	81673582	12.25	0.03	97.66	92.97	53.31	0.9115
974	118761654	115806726	17.37	0.02	97.83	93.59	53.2	0.9261
1060	68928368	67510224	10.13	0.03	96.88	90.86	50.75	0.9158
1063	61282364	59758050	8.96	0.03	96.75	90.61	51.24	0.9065
1064	109498980	106628290	15.99	0.02	97.83	93.56	51.15	0.9175
1065	100898536	97944244	14.69	0.02	97.86	93.72	51.63	0.9112
1068	80701584	79270754	11.89	0.03	97.55	92.67	53.36	0.9078
1069	110749638	108022908	16.2	0.03	97.69	93.25	53.23	0.9163
1073	118278560	115466580	17.32	0.02	97.86	93.69	52.4	0.9071
1075	121300014	118096898	17.71	0.02	97.84	93.58	50.85	0.9198
1077	132896654	129495802	19.42	0.02	97.93	93.86	51.29	0.918
1079	72797408	71274244	10.69	0.03	97.41	92.12	51.09	0.9179
